# Supplementary material
Source: publisher site journal article supplement (https://www.dovepress.com/article/345870)
Supplement: Supplementary file 1 [file get_supplementary_file.php]

**Supplementary materials**

**Investigating the impact of the optimized *trans*-cinnamic acid loaded PLGA nanoparticles on epithelial to mesenchymal transition in breast cancer**

| **F1** | |
| --- | --- |
| **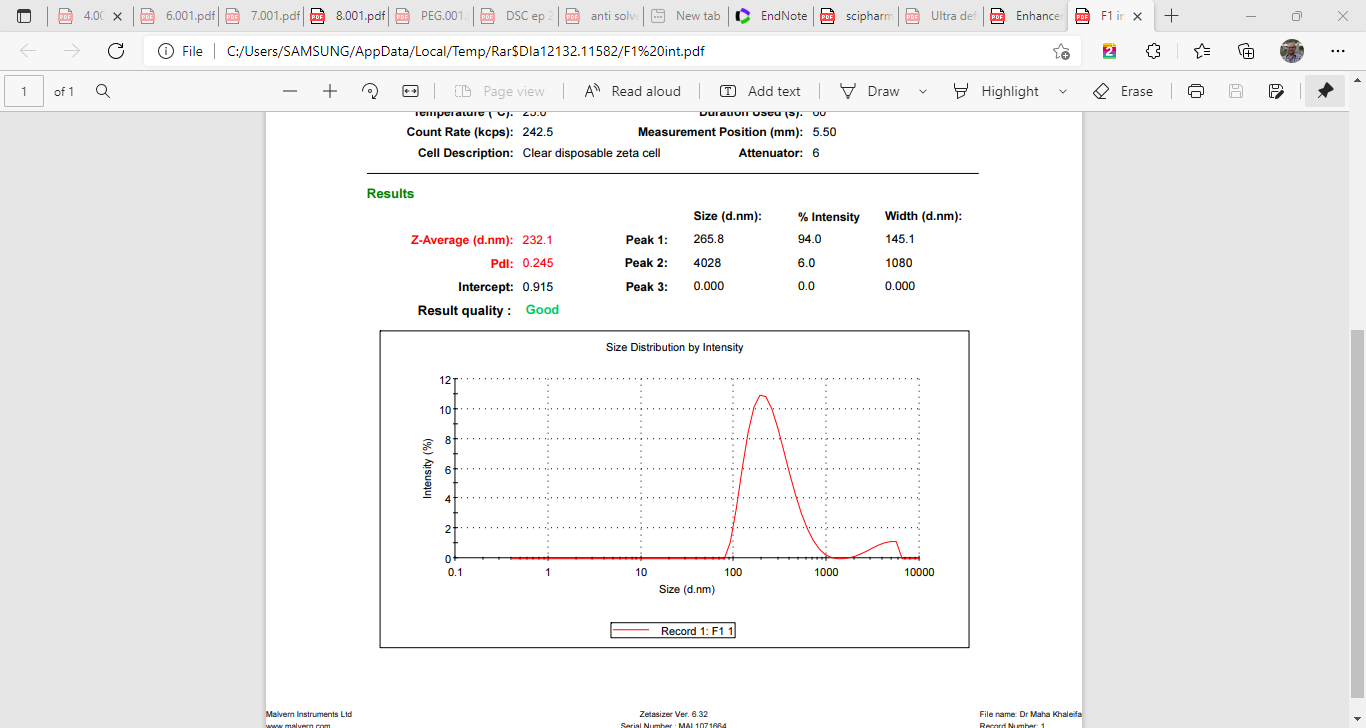** | **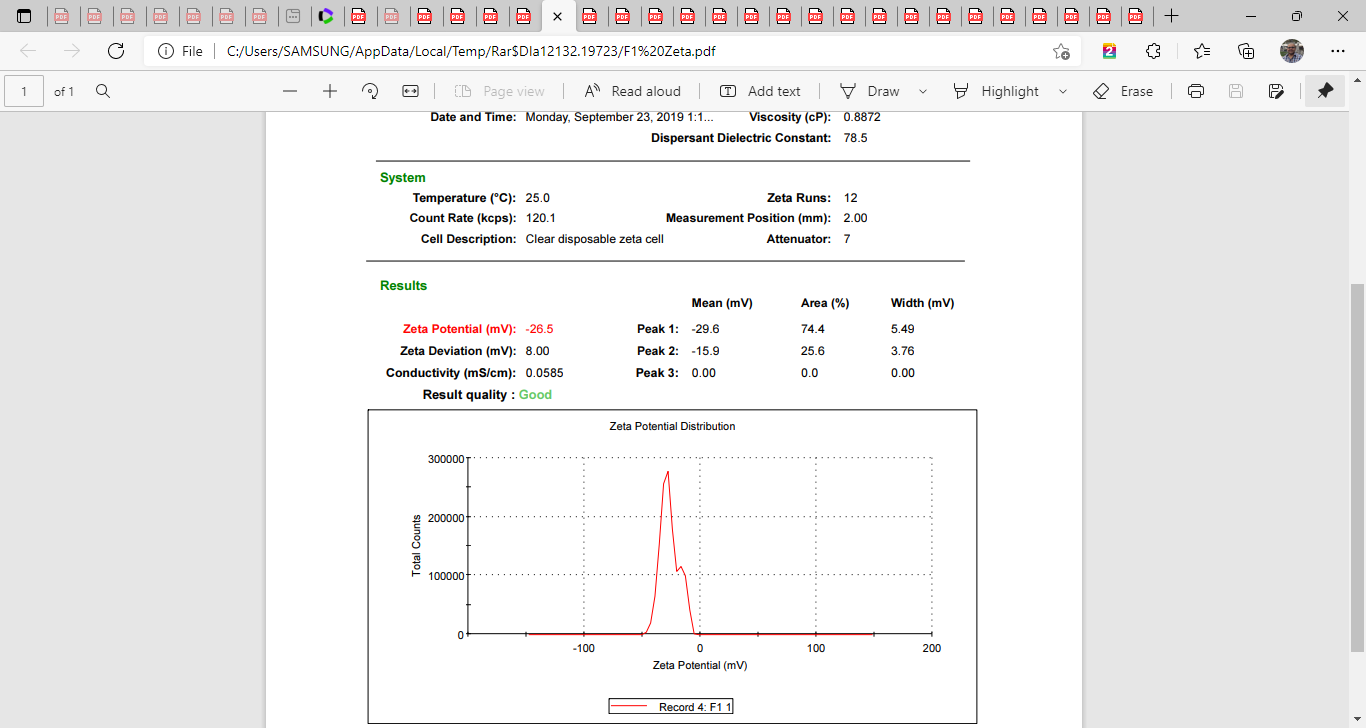** |

**Figure S1.** Particle size distribution and zeta potential for batch F1.

| **F2** | |
| --- | --- |
| **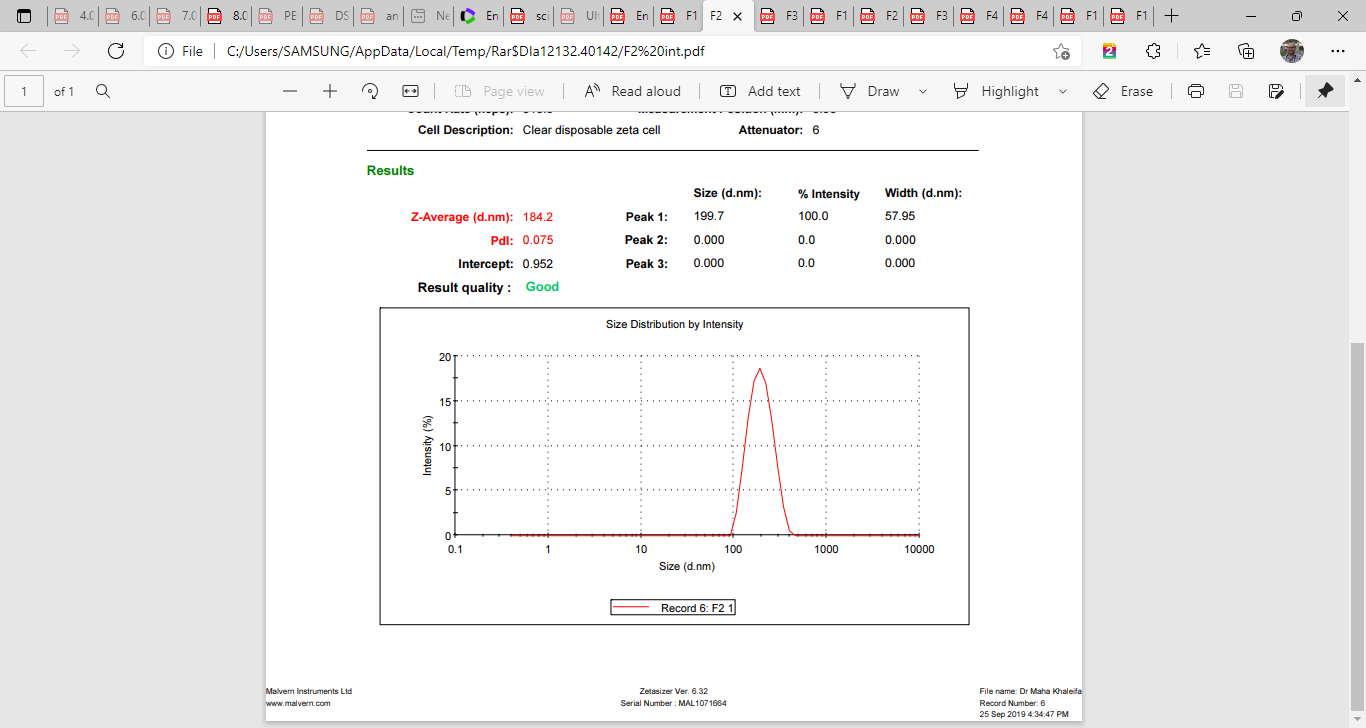** | **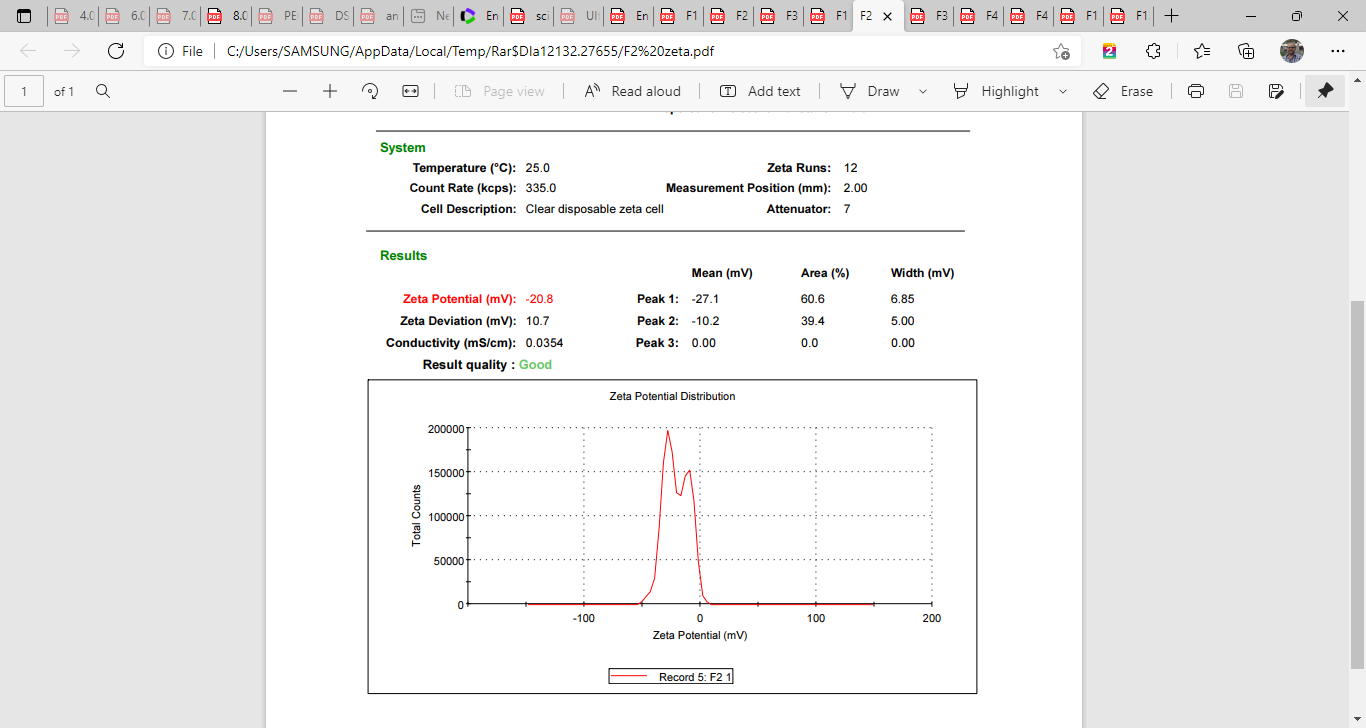** |

**Figure S2.** Particle size distribution and zeta potential for batch F2.

| **F3** | |
| --- | --- |
| **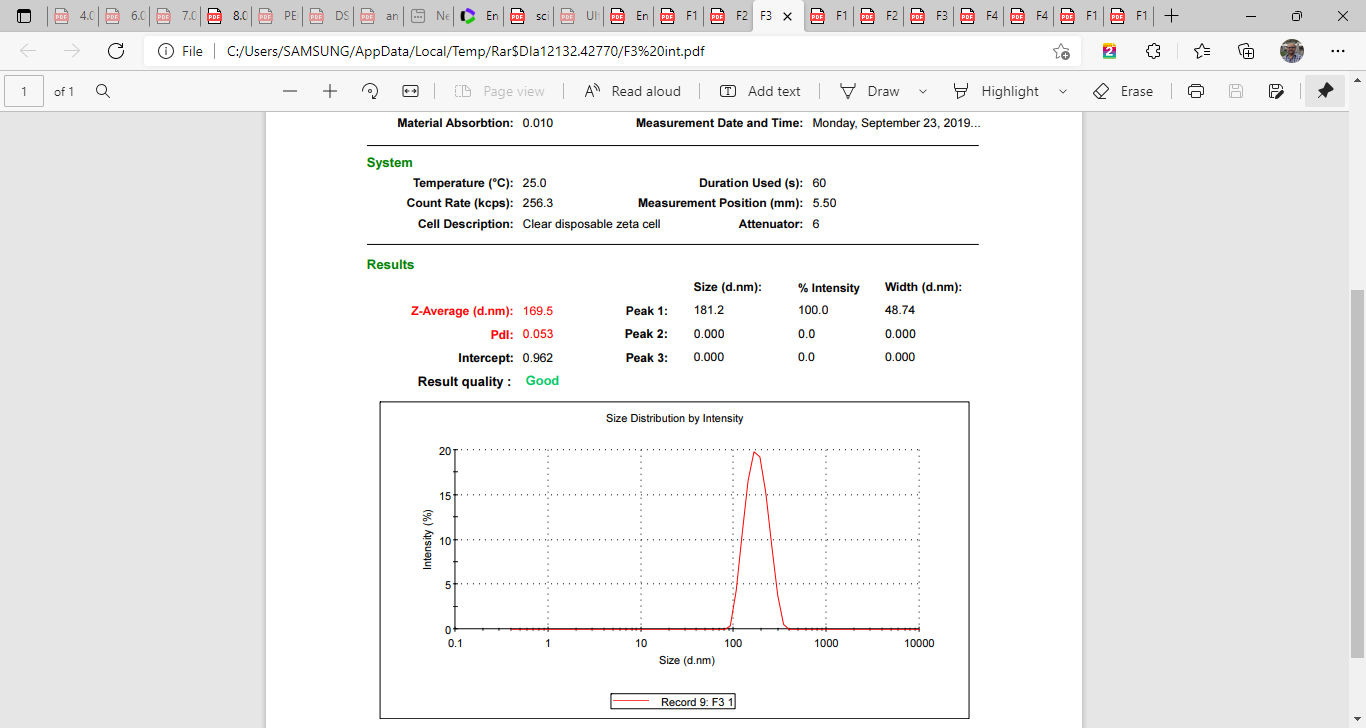** | **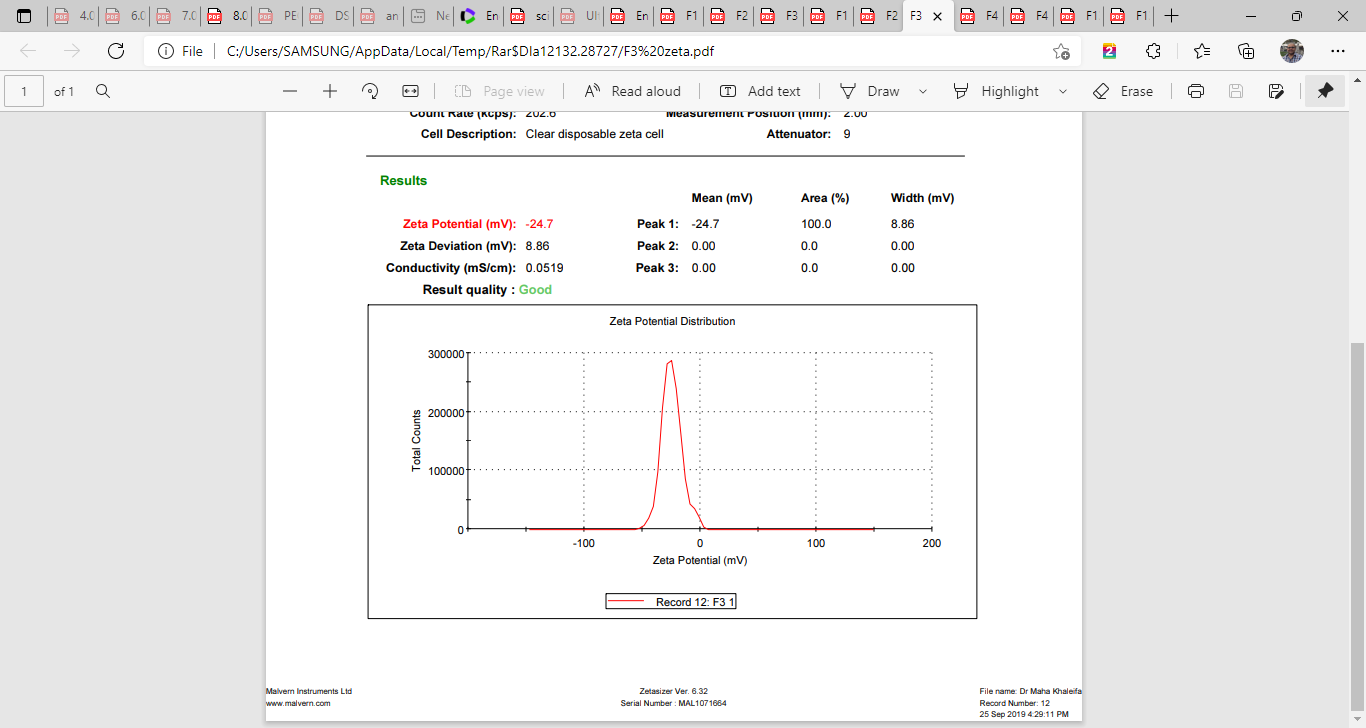** |

**Figure S3.** Particle size distribution and zeta potential for batch F3.

| **F4** | |
| --- | --- |
| **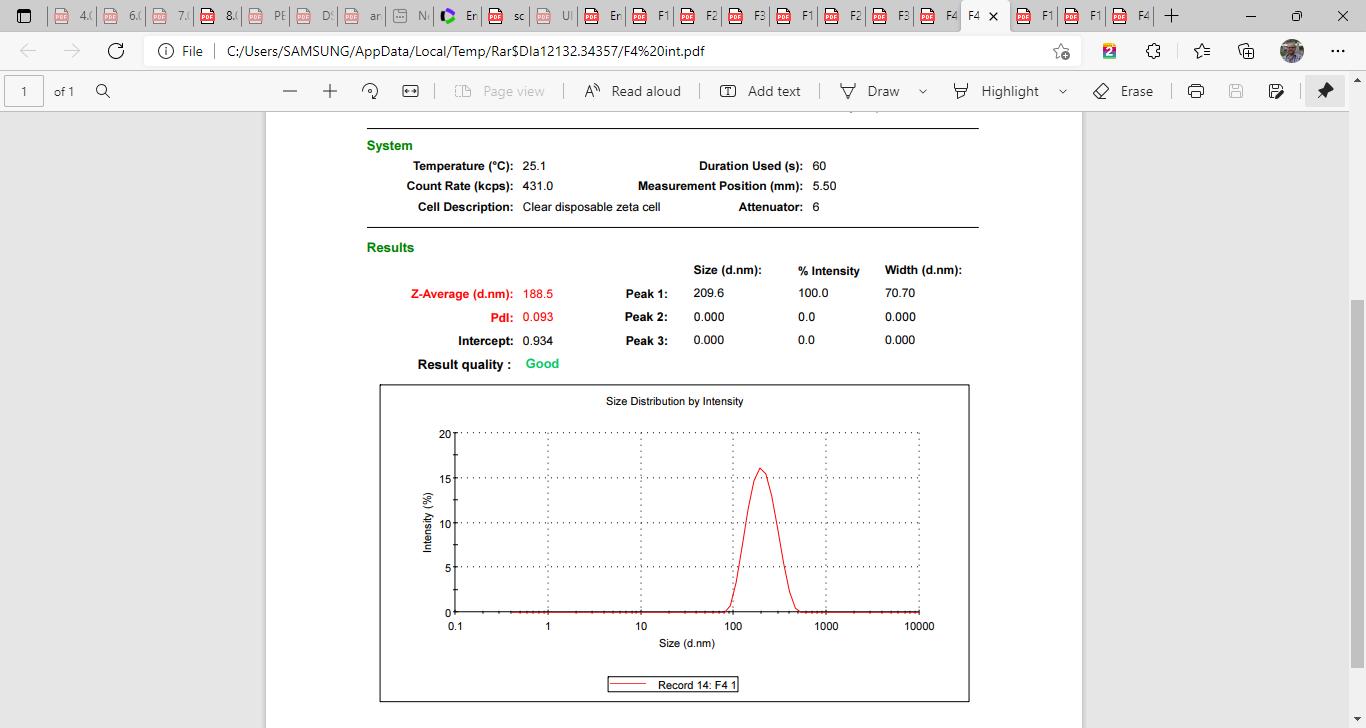** | **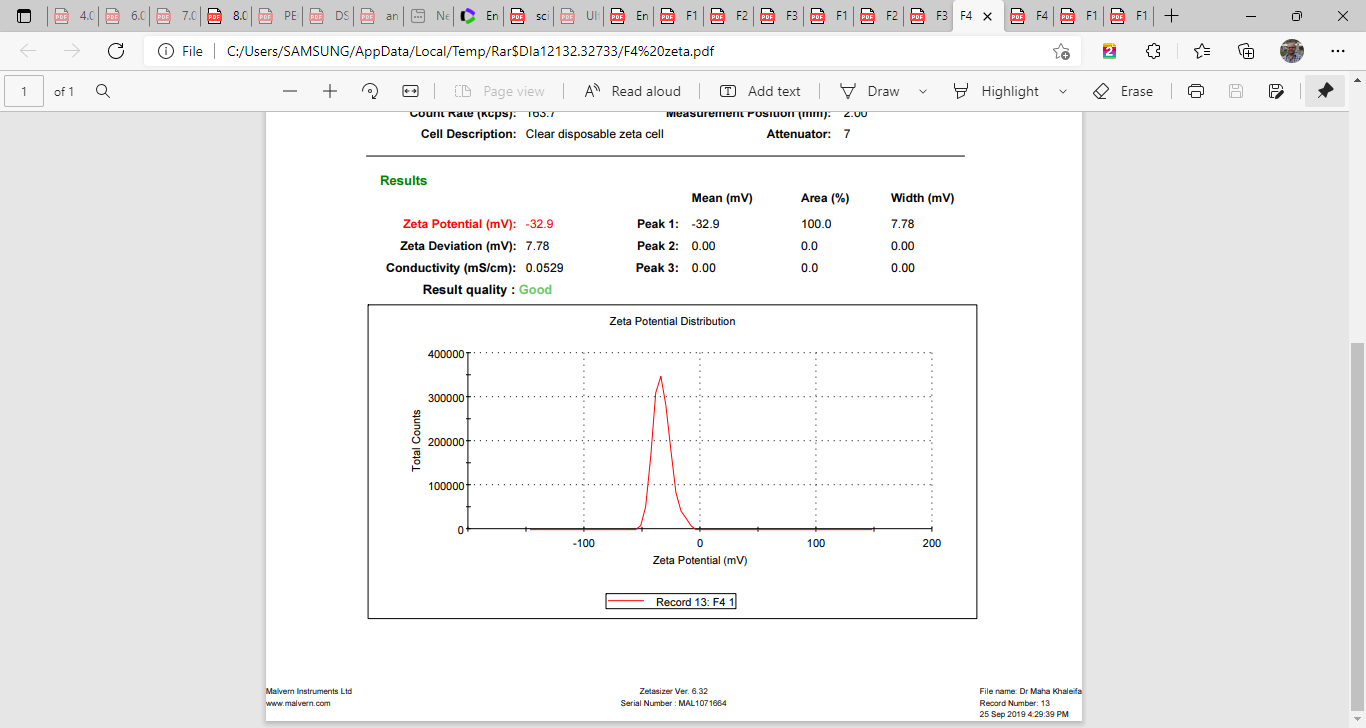** |

**Figure S4.** Particle size distribution and zeta potential for batch F4.

| **F5** | |
| --- | --- |
| **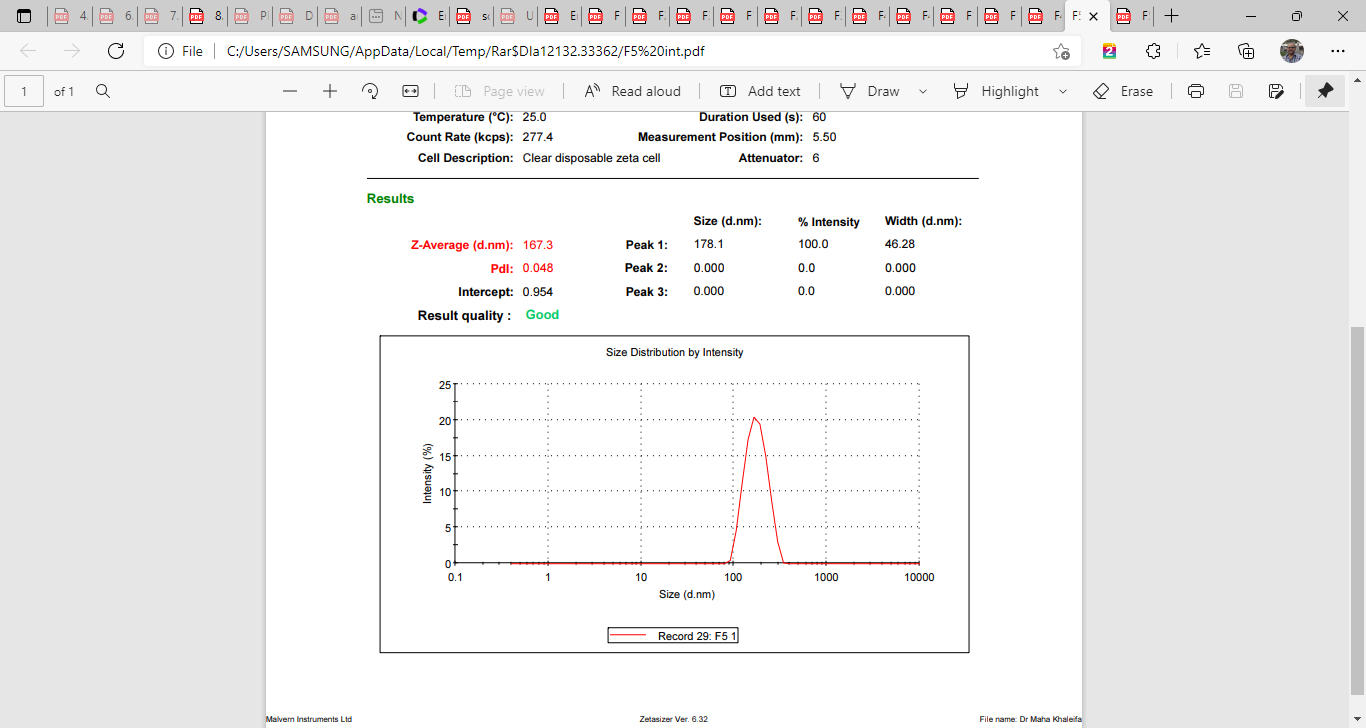** | **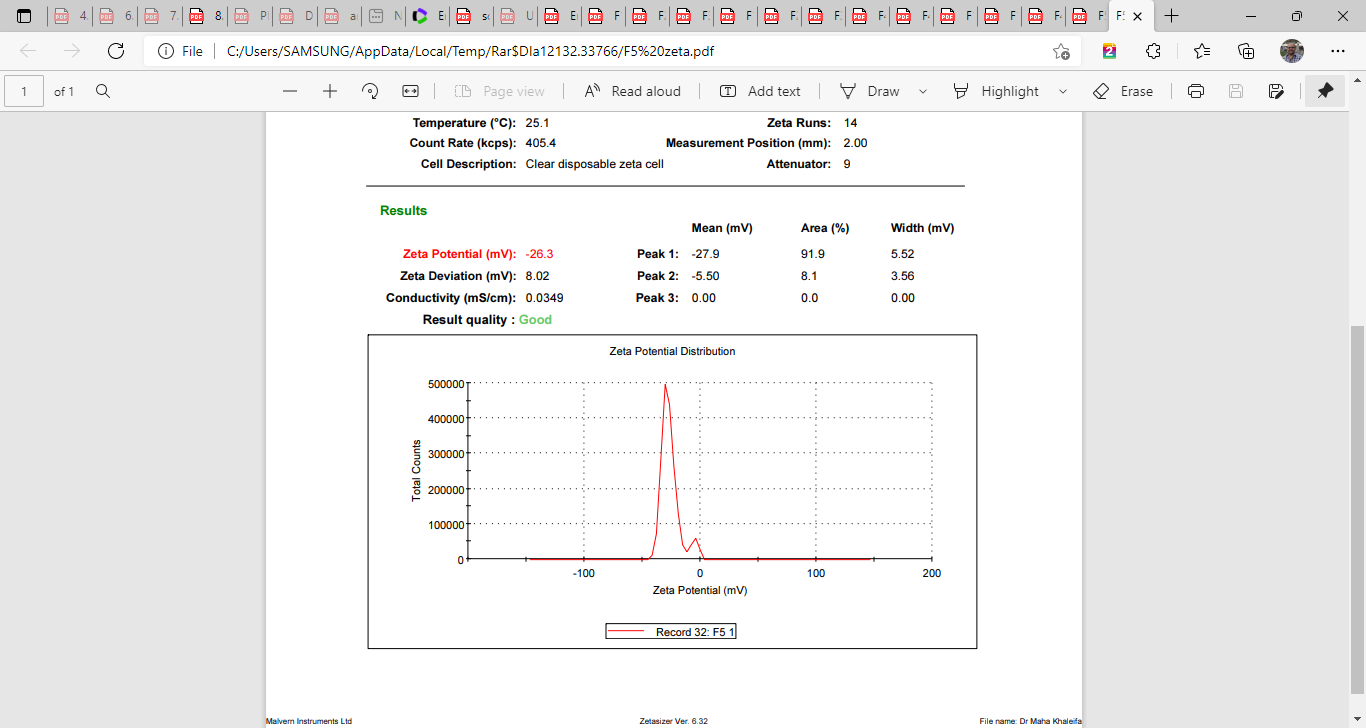** |

**Figure S5.** Particle size distribution and zeta potential for batch F5.

| **F6** | |
| --- | --- |
| **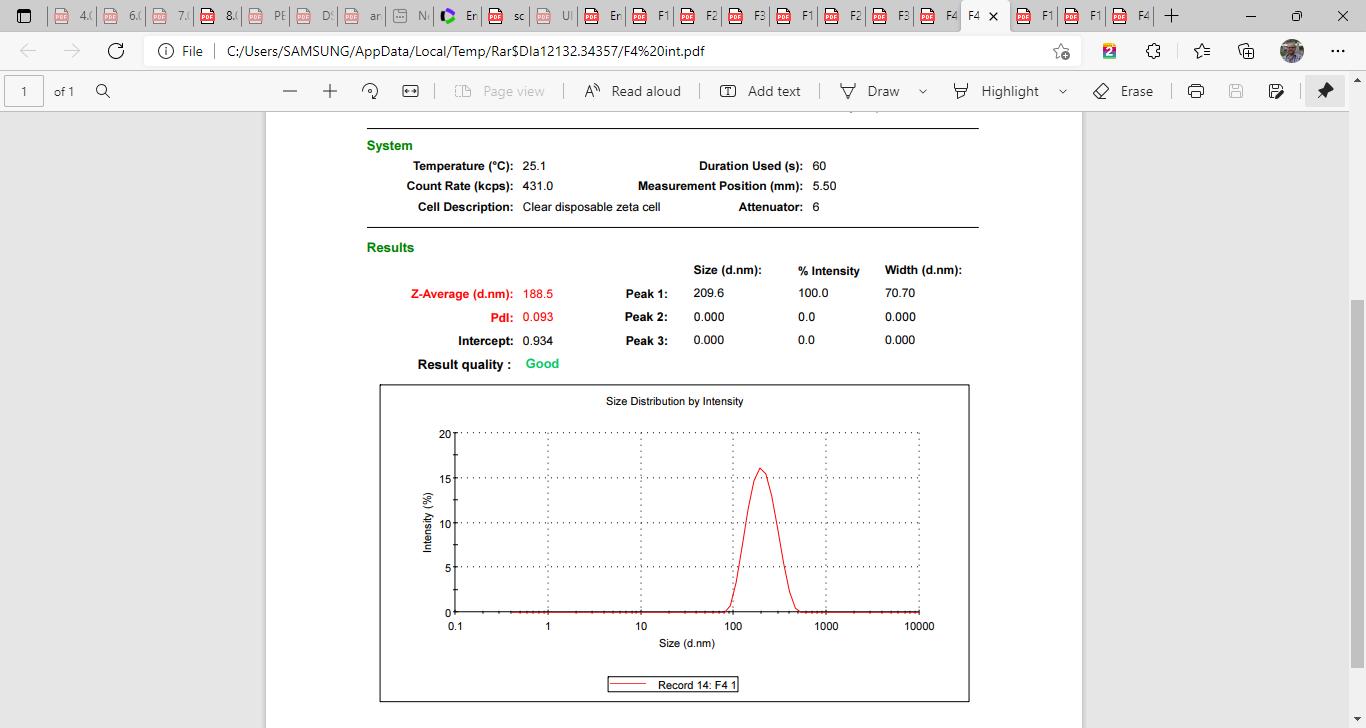** | **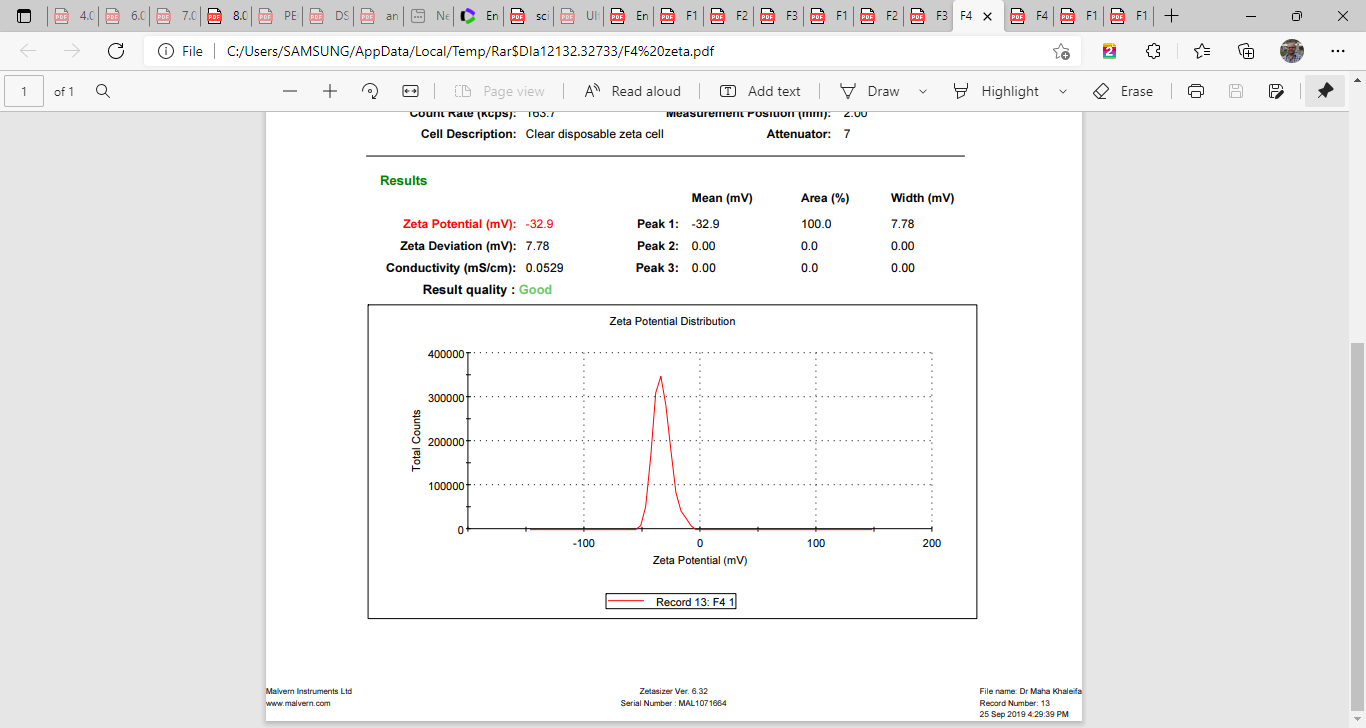** |

**Figure S6.** Particle size distribution and zeta potential for batch F6.

| **F7** | |
| --- | --- |
| **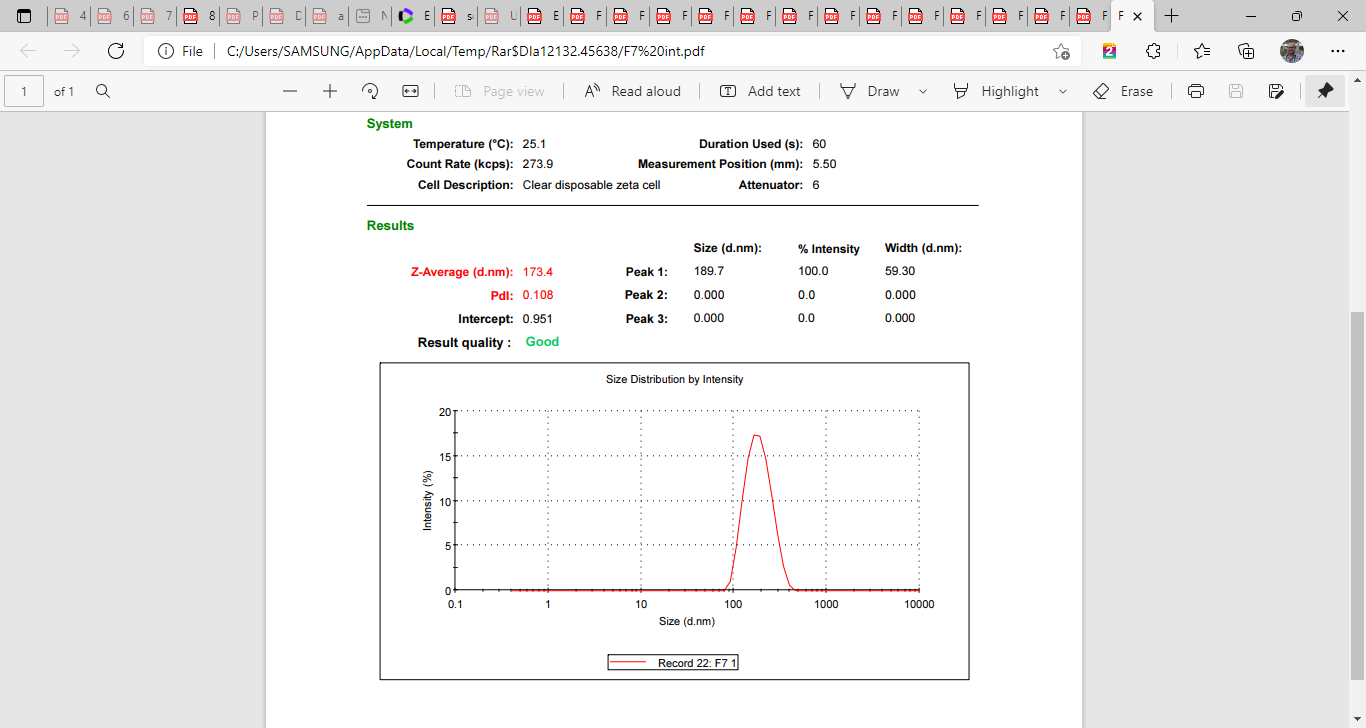** | **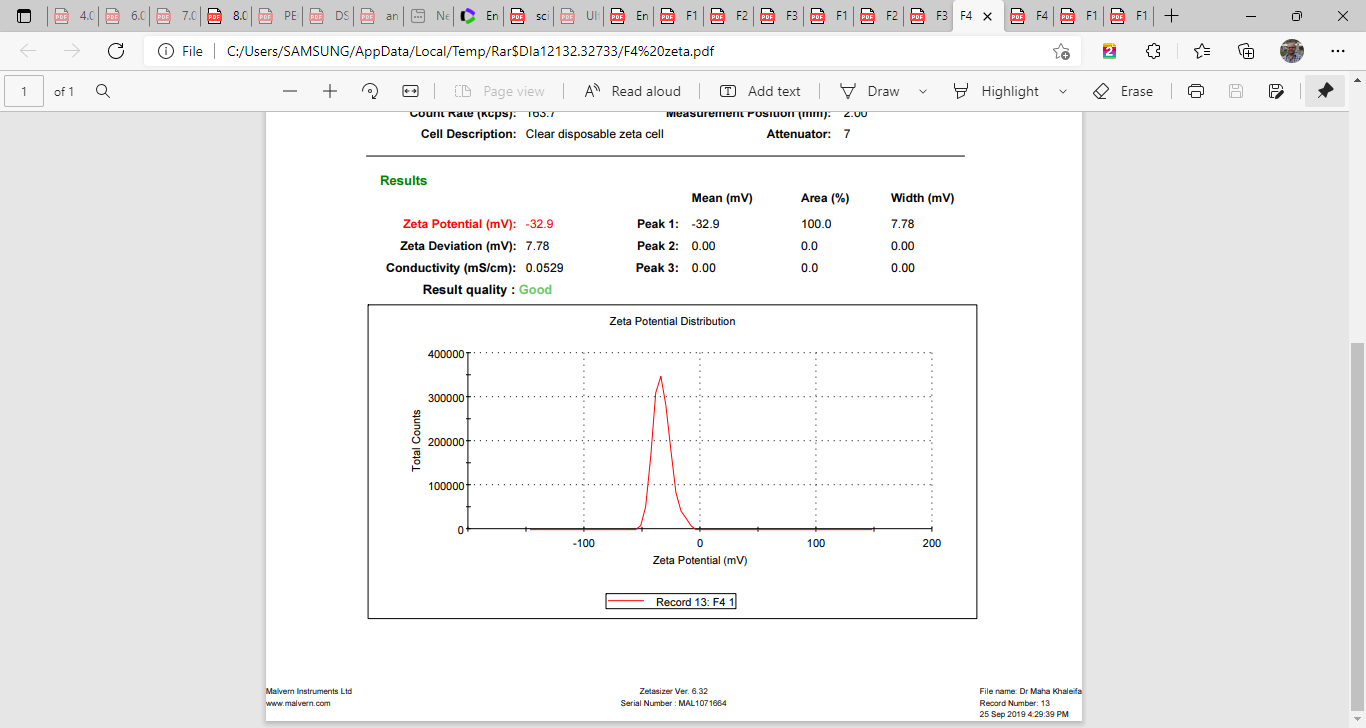** |

**Figure S7.** Particle size distribution and zeta potential for batch F7.

| **F8** | |
| --- | --- |
| **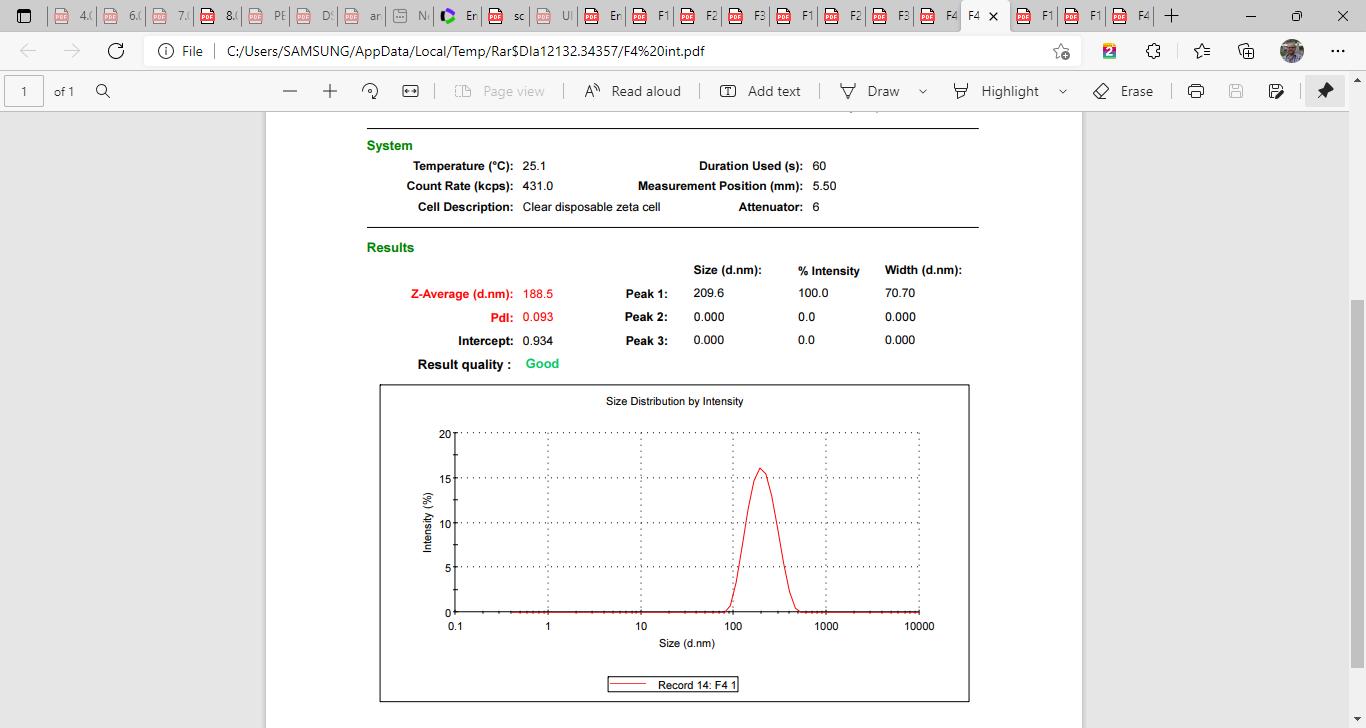** | **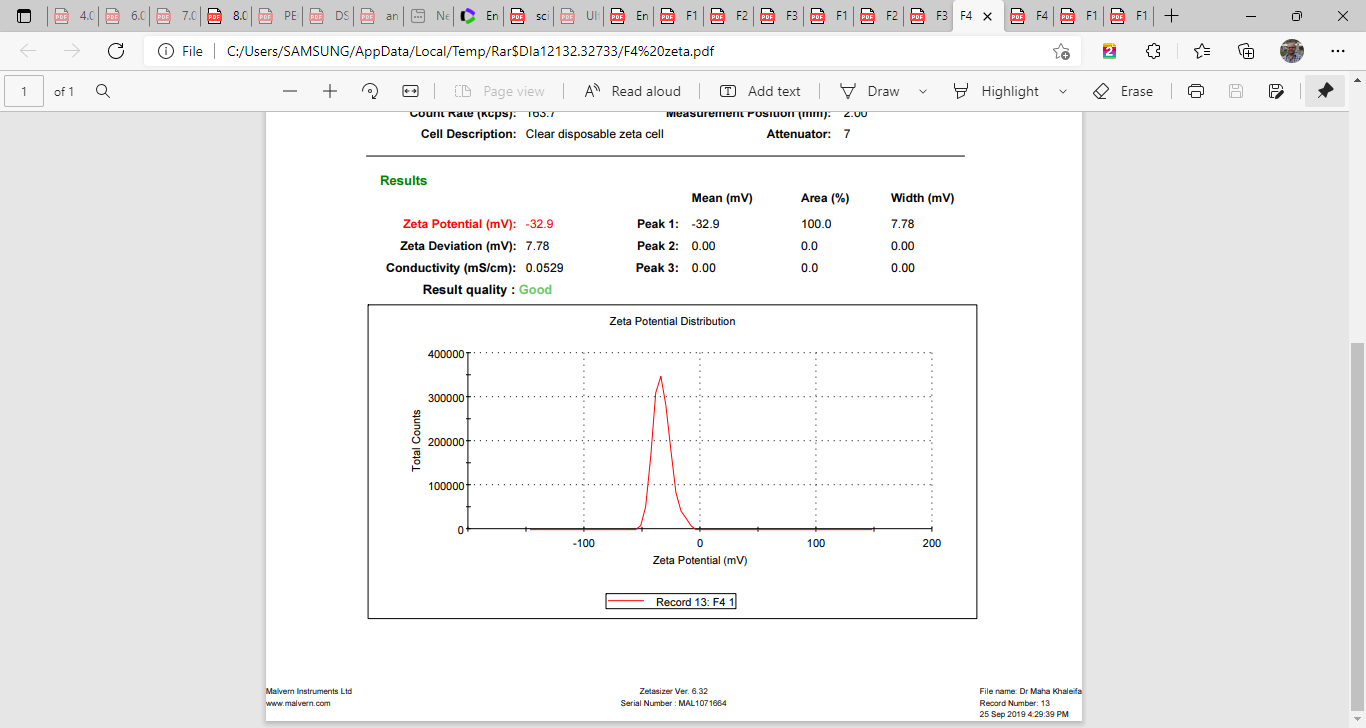** |

**Figure S8.** Particle size distribution and zeta potential for batch F8.

| **F9** | |
| --- | --- |
| **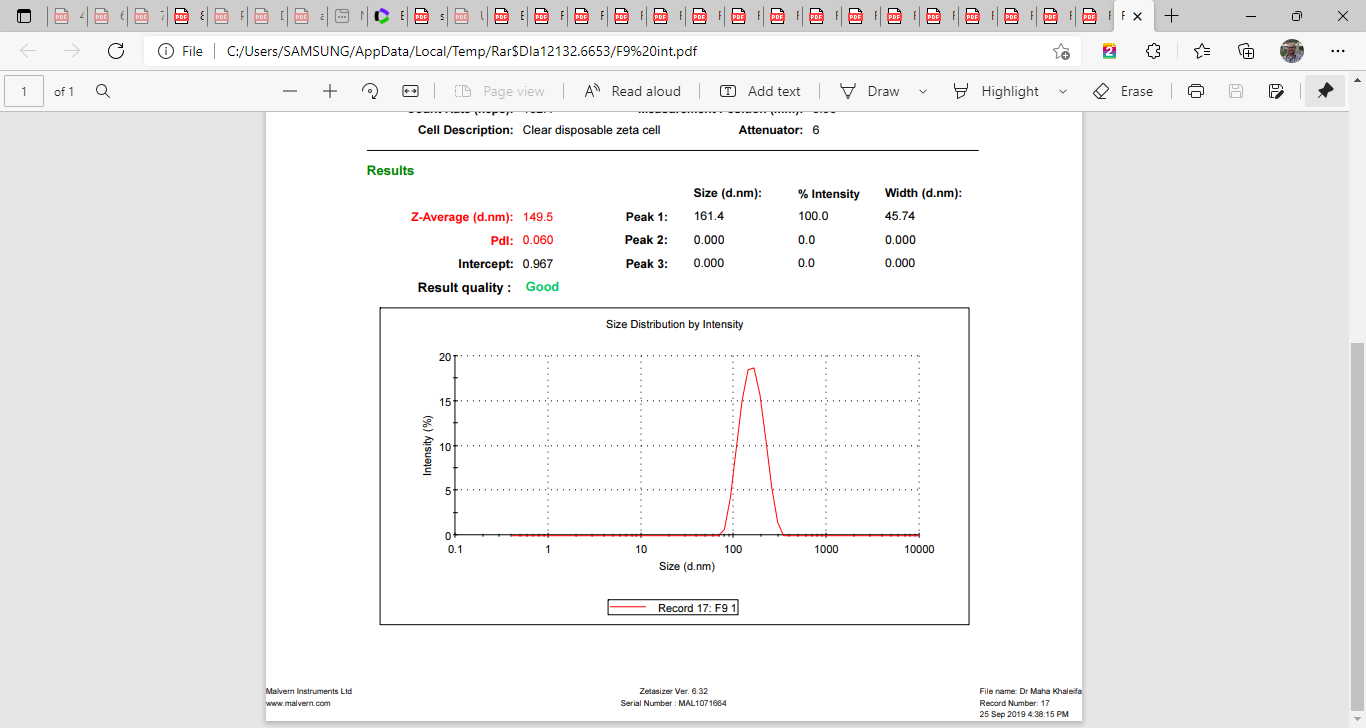** | **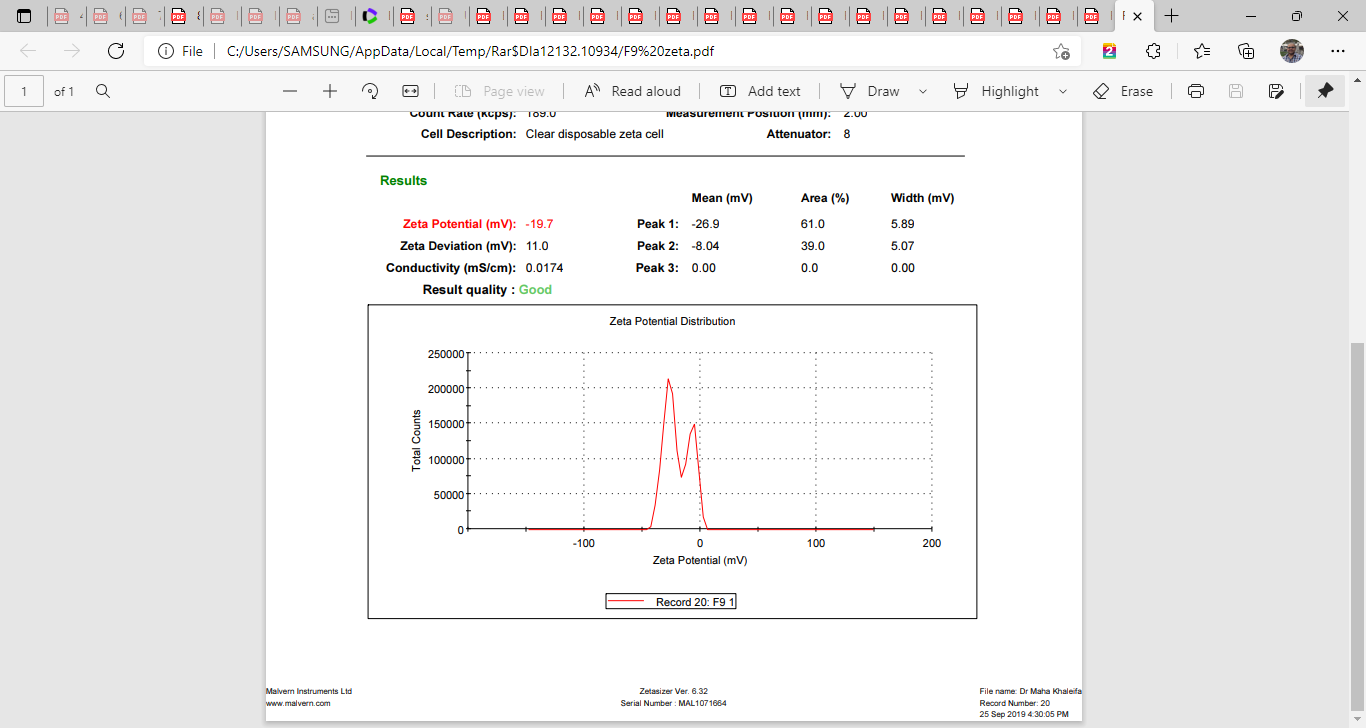** |

**Figure S9.** Particle size distribution and zeta potential for batch F9.

| **F10** | |
| --- | --- |
| **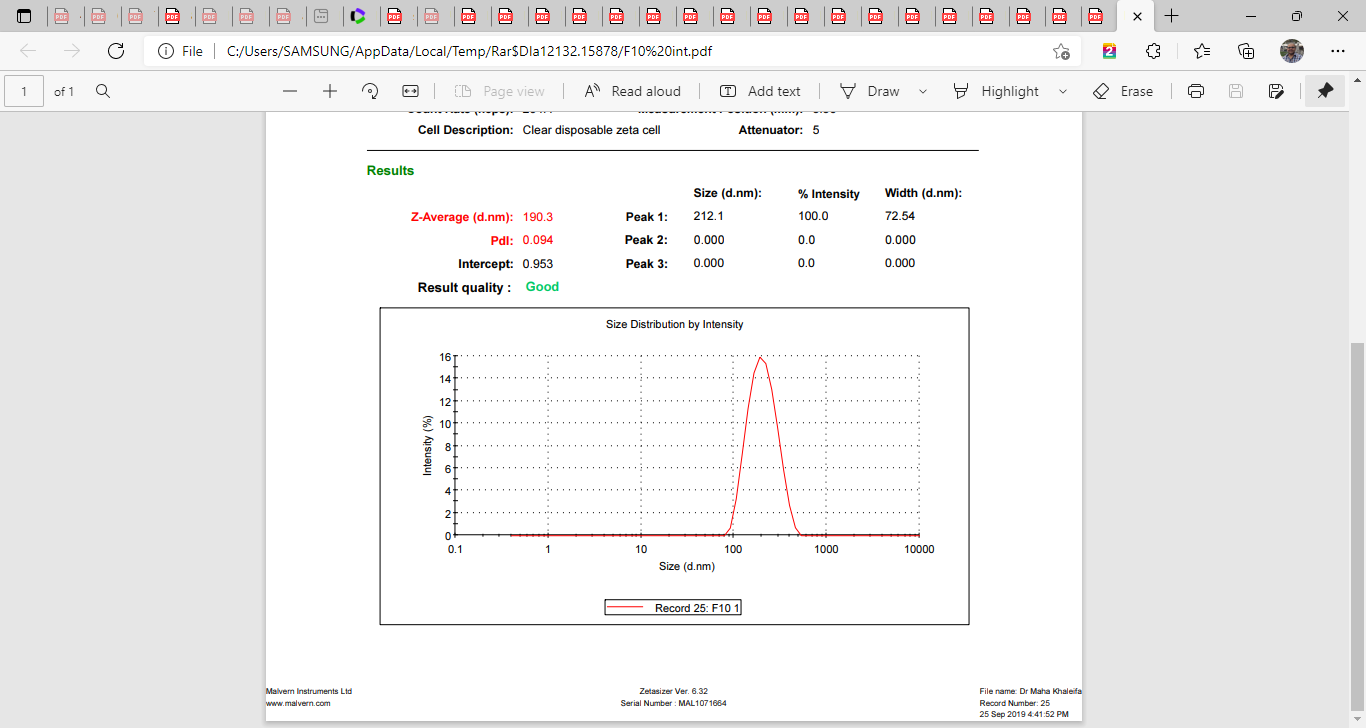** | **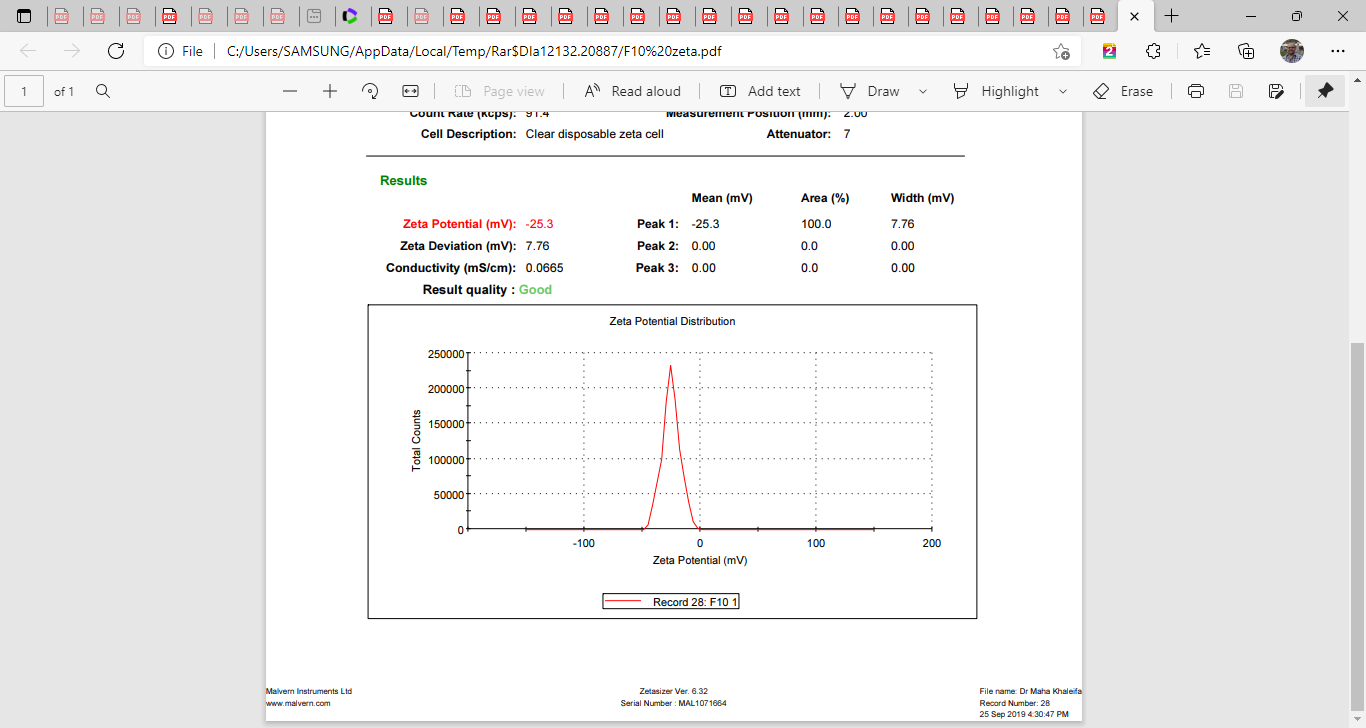** |

**Figure S10.** Particle size distribution and zeta potential for batch F10.

| **F11** | |
| --- | --- |
| **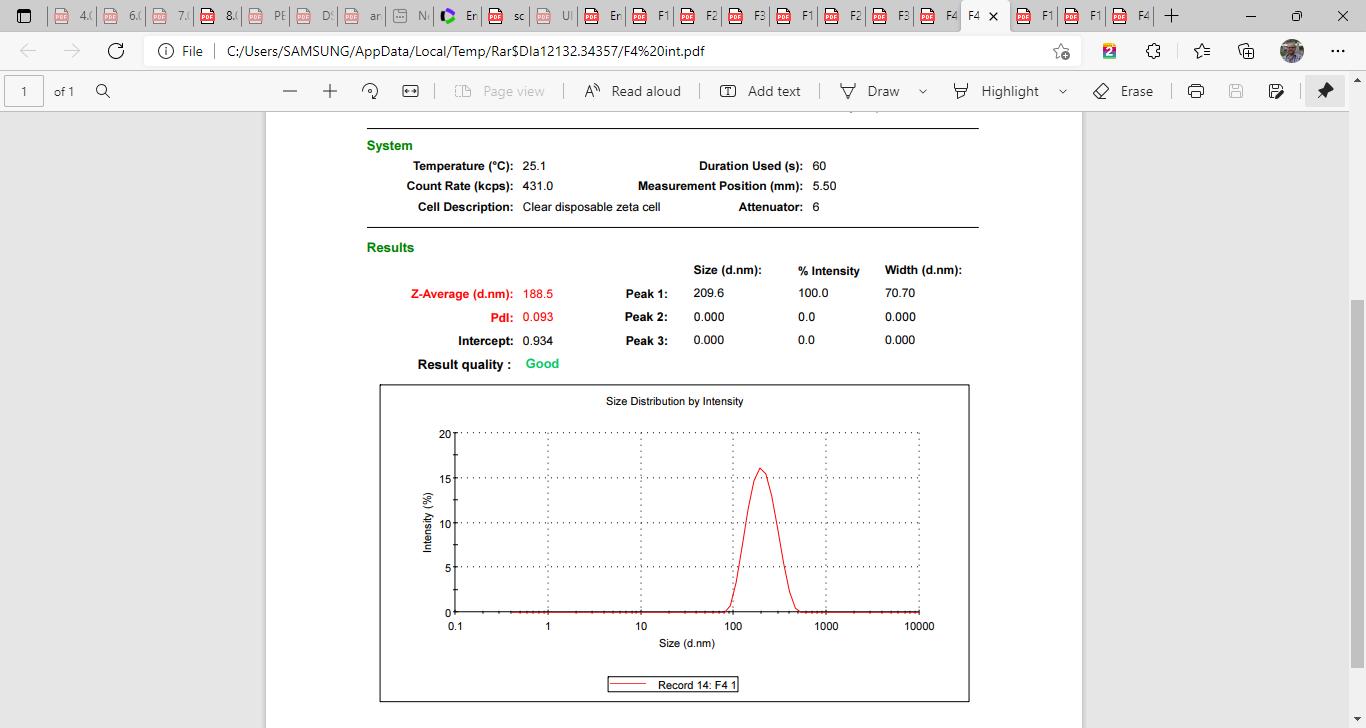** | **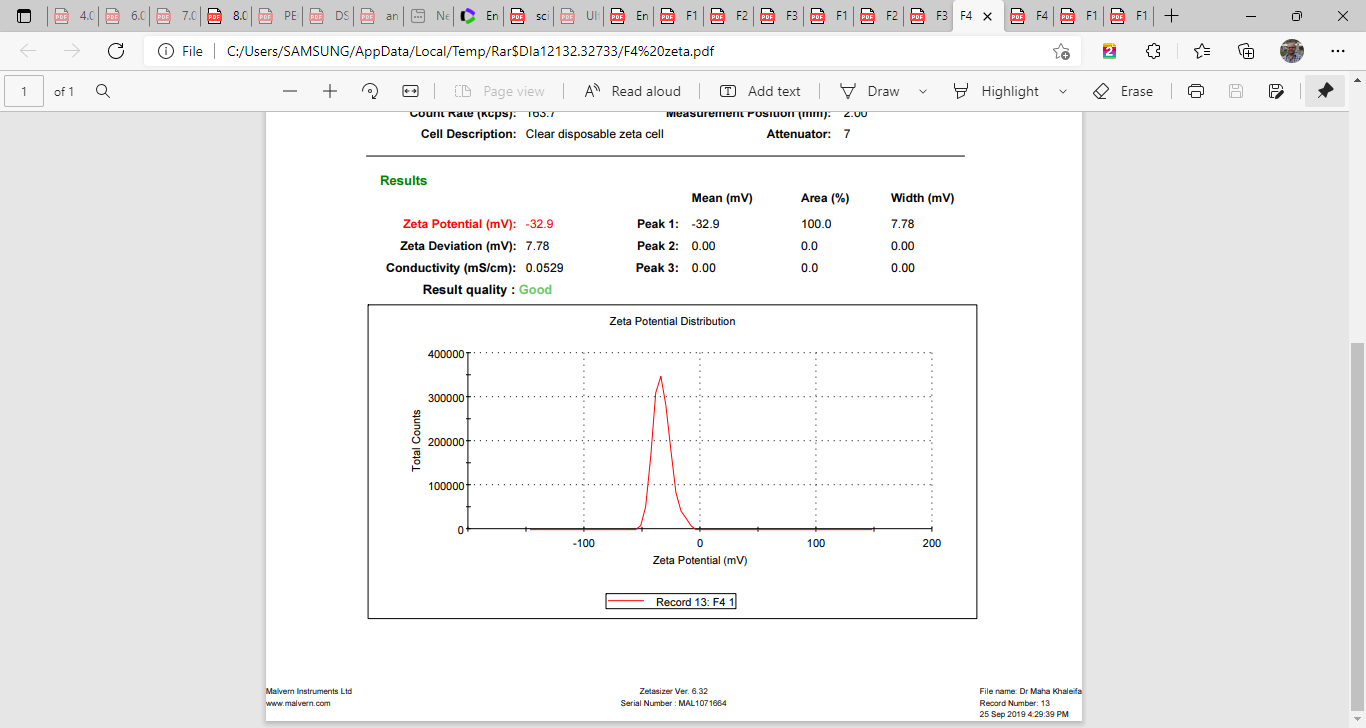** |

**Figure S11.** Particle size distribution and zeta potential for batch F11.

| **F12** | |
| --- | --- |
| **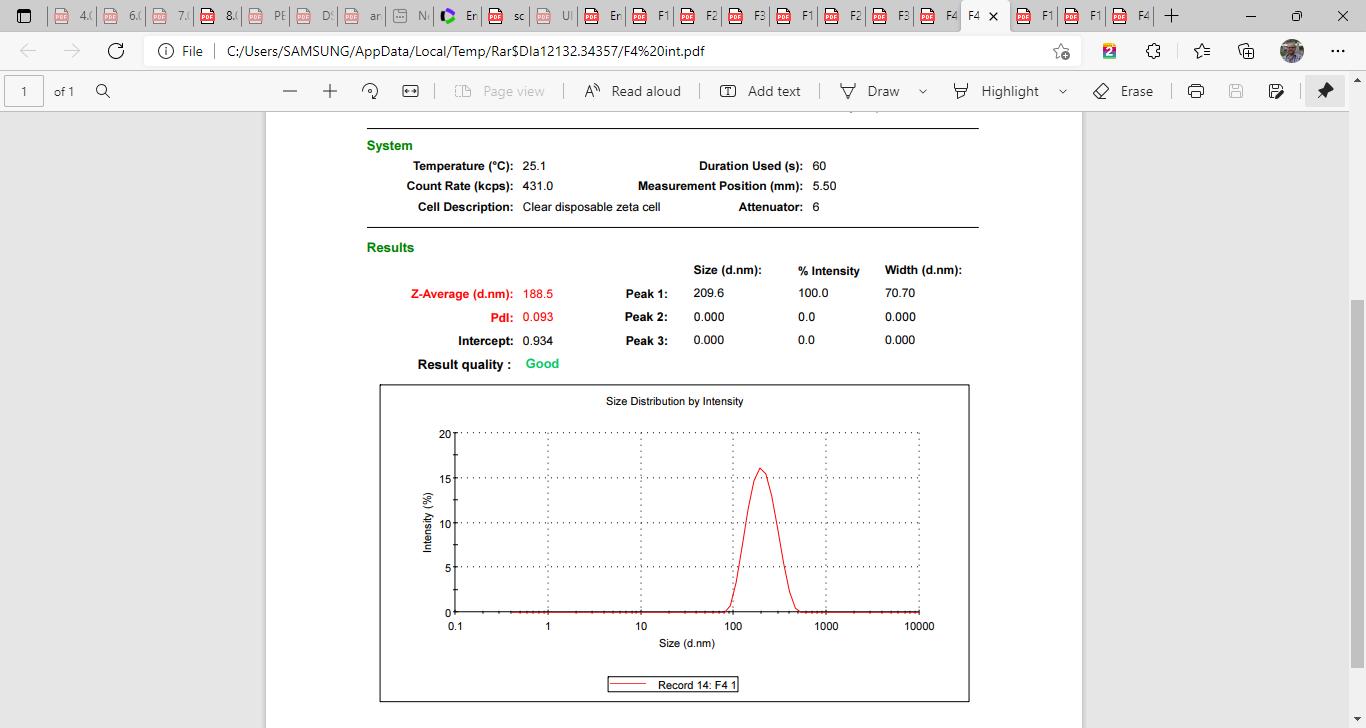** | **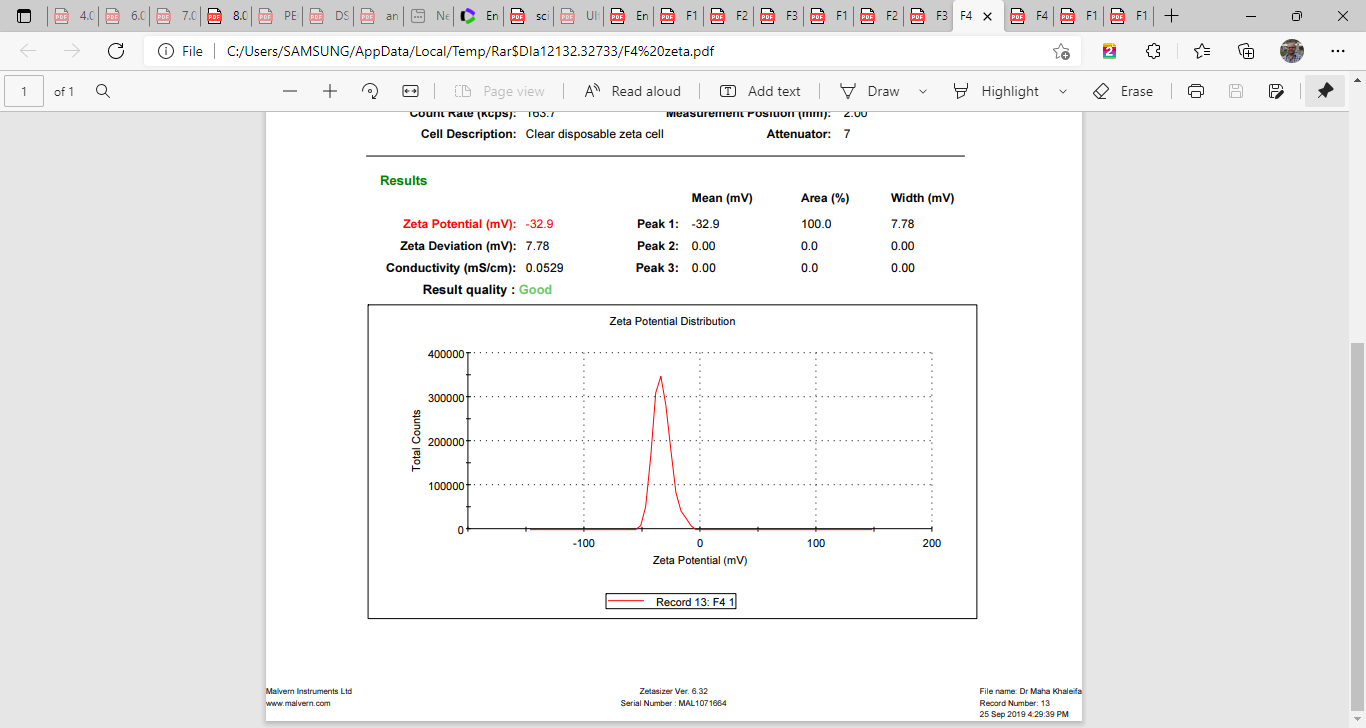** |

**Figure S12.** Particle size distribution and zeta potential for batch F12.

| **F13** | |
| --- | --- |
| **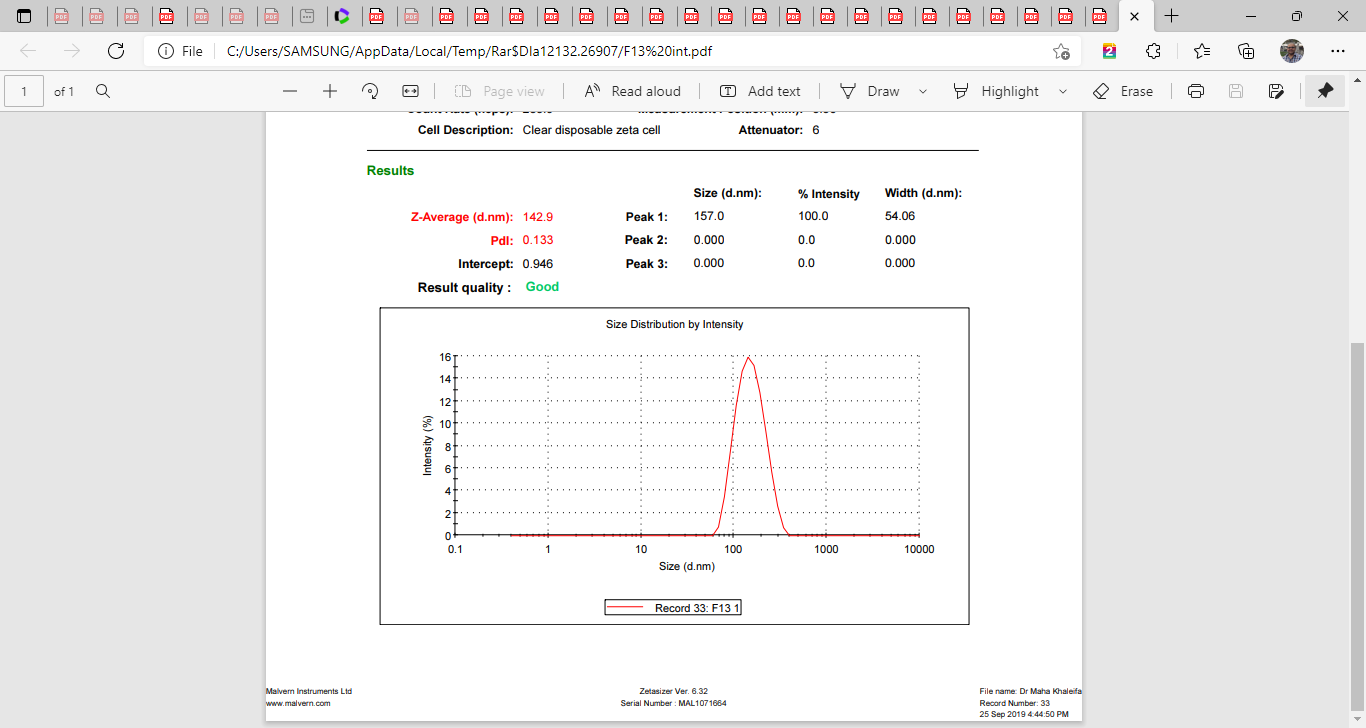** | **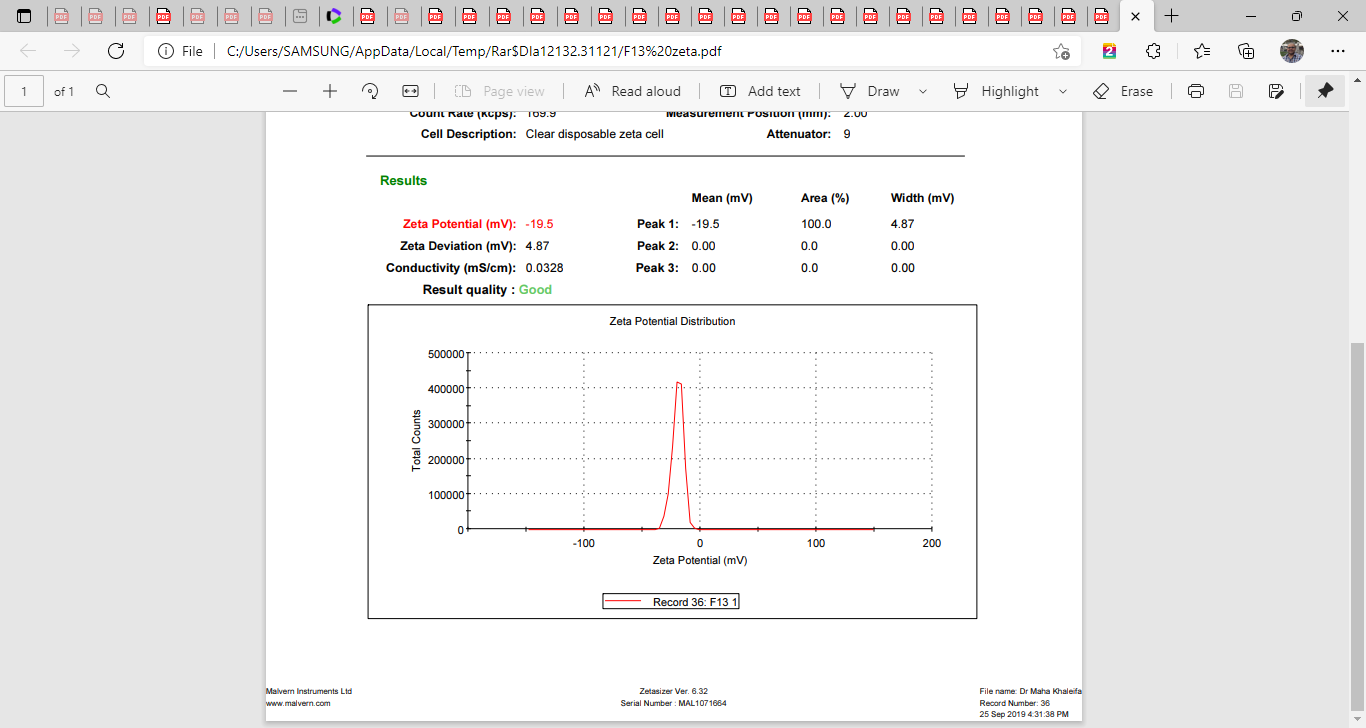** |

**Figure S13.** Particle size distribution and zeta potential for batch F13.
